# Supplementary material for: Efficient separation of CO2 from CH4 and N2 in an ultra-stable microporous metal–organic framework
Source: Royal Society of Chemistry journal article supplement (doi:10.1039/d3dt01022h), 2023-01-01
Supplement: d3dt01022h1.pdf [file d3dt01022h1.pdf]

*Supporting Information*

**Efficient separation of CO<sub>2</sub> from CH<sub>4</sub> and N<sub>2</sub> in an ultra-stable  
microporous metal-organic framework**

Chaohui He\*, Peng Zhang, Sai Ma, Yujuan Zhang, Tuoping Hu\*

*Department of Chemistry, College of Chemistry and Chemical Engineering, North*

*University of China, Taiyuan, 030051, Shanxi, P. R. China*

## Isosteric heat of adsorption

The isosteric heats of adsorption ( $Q_{st}$ ) were calculated from single-component adsorption isotherms of CO<sub>2</sub> measured at 273, 298 and 313 K. The isotherms were fit to a virial Eq.

$$\ln P = \ln N + \frac{1}{T} \sum_{i=0}^m a_i N^i + \sum_{j=0}^n b_j N^j$$

Where  $N$  is the amount of gas adsorbed at pressure  $P$ ,  $a_i$  and  $b_j$  are virial coefficients,  $m$  and  $n$  are the numbers of coefficients require to adequately describe the isotherm. Using the fitting parameters obtained from the above equation,  $Q_{st}$  can be calculated using the following Eq.

$$Q_{st} = -R \sum_{i=0}^m a_i N^i$$

$R$  is the universal gas constant.

## Ideal adsorbed solution theory (IAST) calculations

The single-component adsorption isotherms of CO<sub>2</sub>, CH<sub>4</sub> and N<sub>2</sub> on Y-bptc obtained at 298 K were fitted using the dual site Langmuir model.

$$q = q_{A,sat} \frac{b_A p}{1 + b_A p} + q_{B,sat} \frac{b_B p}{1 + b_B p}$$

where  $q$  represents the adsorbed capacity per mass of adsorbent (mol/kg),  $q_{A,sat}$  and  $q_{B,sat}$  are the saturation uptake capacities at site A and site B, respectively,  $b_A$  and  $b_B$  represent the constant at adsorption site A and site B, respectively,  $P$  represents the total pressure of the gas at the equilibrium (kPa).

The adsorption selectivity defined as follows:

$$S_{ads} = \frac{q_A/q_B}{y_A/y_B}$$

where  $q_A$  and  $q_B$  represent the component molar loading within the MOFs and  $y_A$  and  $y_B$  are the corresponding mole fraction used in the feed gas mixture.

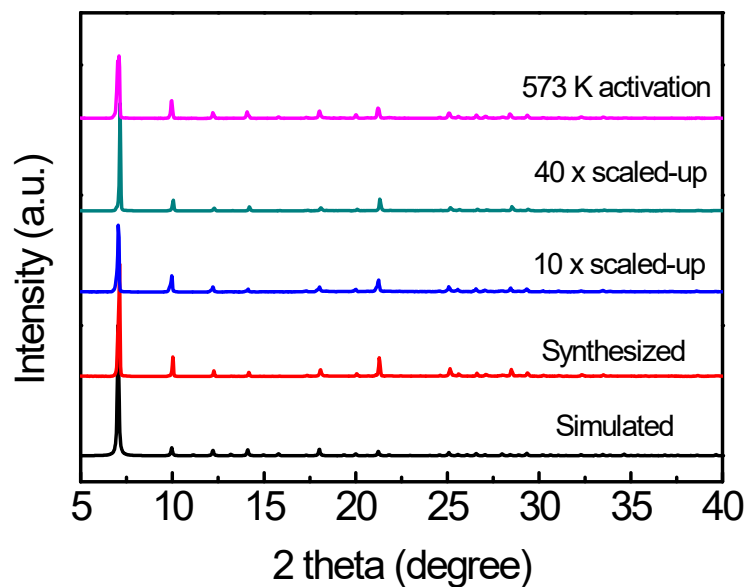

**Fig. S1.** PXRD patterns recorded for Y-bptc.

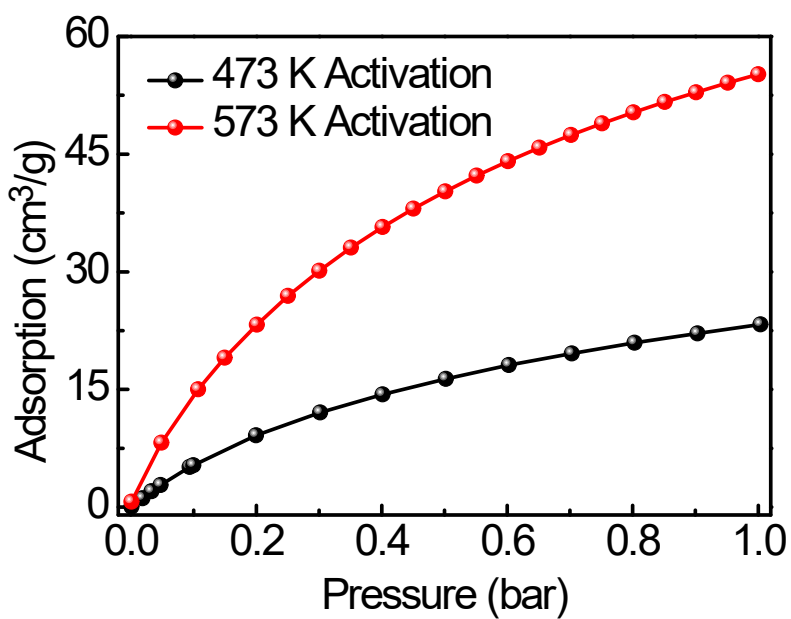

**Fig. S2.** The single-adsorption isotherms of Y-bptc for  $\text{CO}_2$  at different activation temperatures.

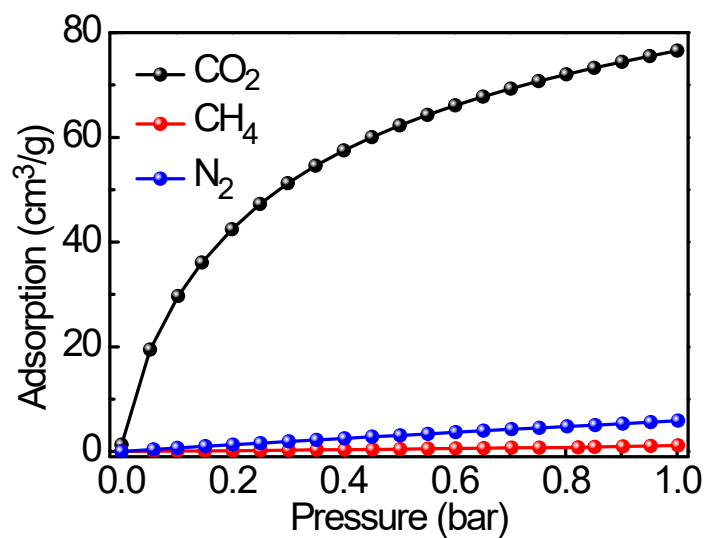

**Fig. S3.** The single-adsorption isotherms of Y-bptc for CO<sub>2</sub>, CH<sub>4</sub> and N<sub>2</sub> at 273 K.

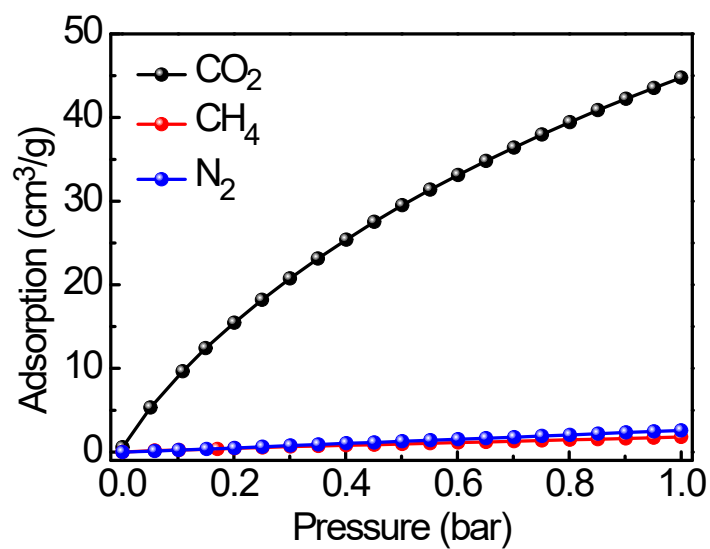

**Fig. S4.** The single-adsorption isotherms of Y-bptc for CO<sub>2</sub>, CH<sub>4</sub> and N<sub>2</sub> at 313 K.

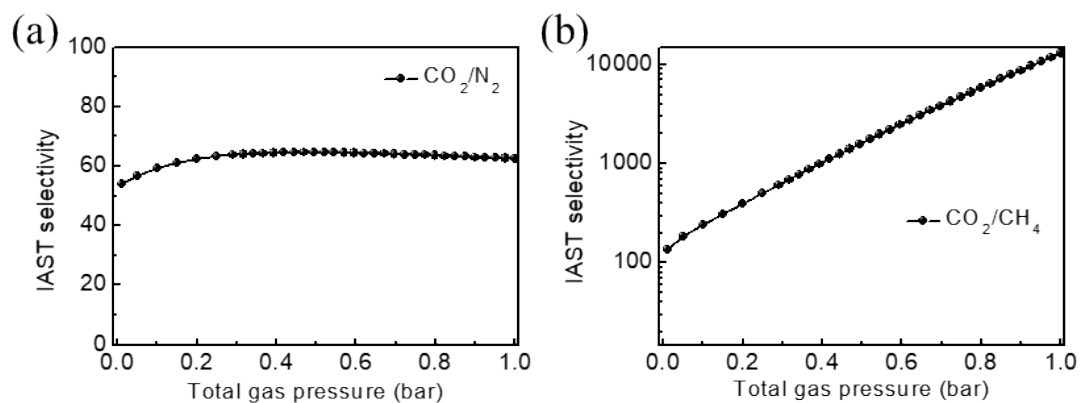

**Fig. S5.** The adsorption selectivity of (a)  $\text{CO}_2/\text{N}_2$  (0.15/0.85) and (b)  $\text{CO}_2/\text{CH}_4$  (1/1) for Y-bptc at 298 K.

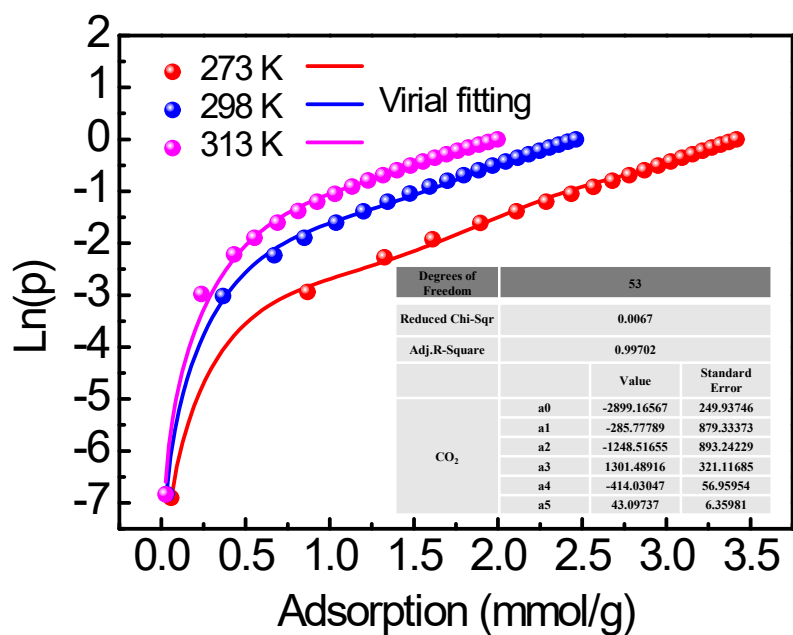

**Fig. S6.**  $\text{CO}_2$  fitting isotherms of Y-bptc through virial equation.

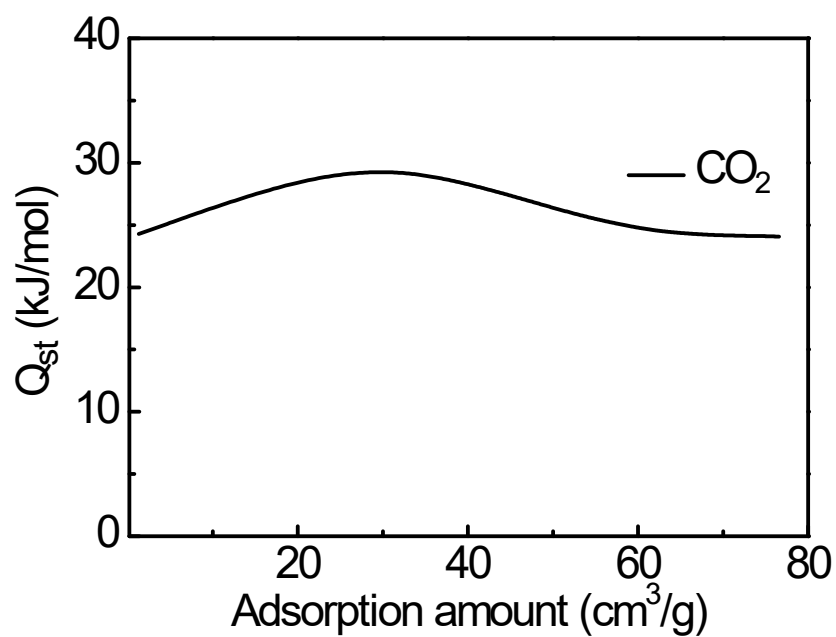

**Fig. S7.** The adsorption heat of Y-bptc for CO<sub>2</sub>.

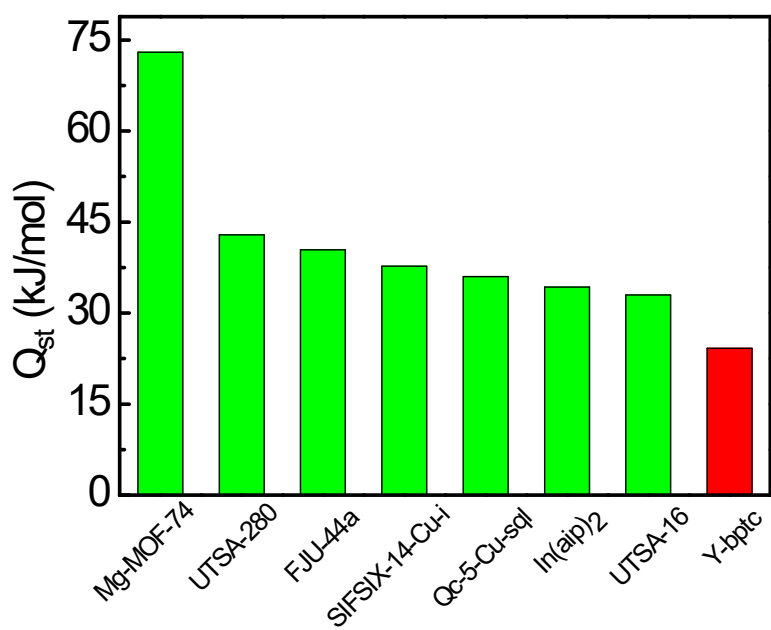

**Fig. S8.** The comparison of adsorption heat of reported CO<sub>2</sub> adsorbents.

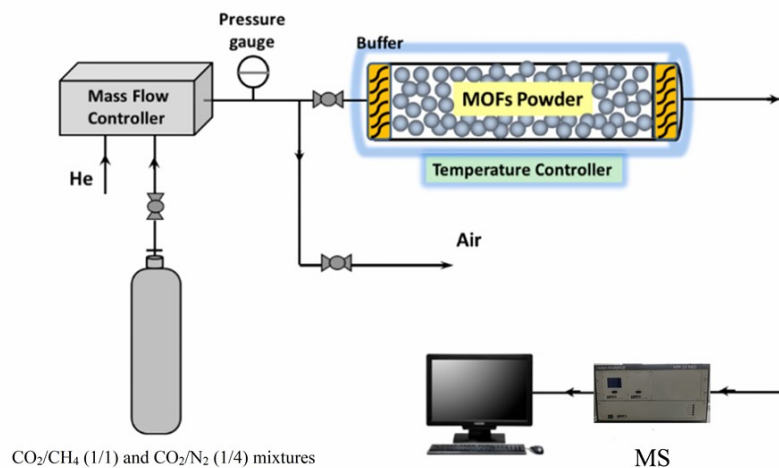

**Fig. S9.** The breakthrough experimental set-up schematic under dry conditions.

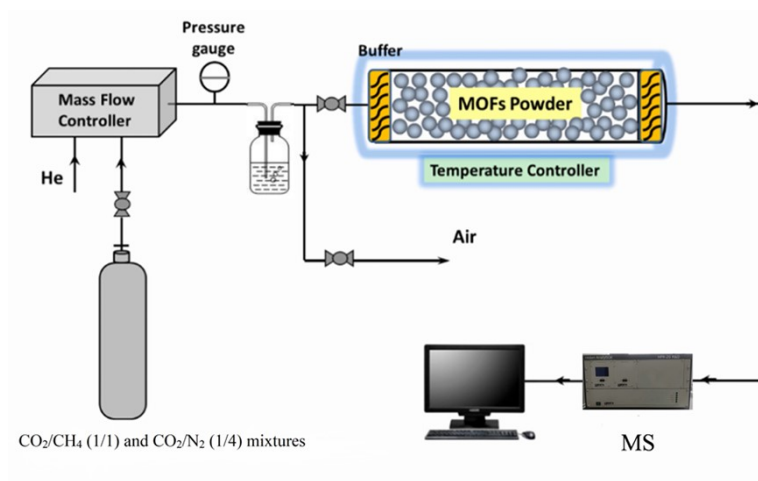

**Fig. S10.** The breakthrough experimental set-up schematic under wet conditions.

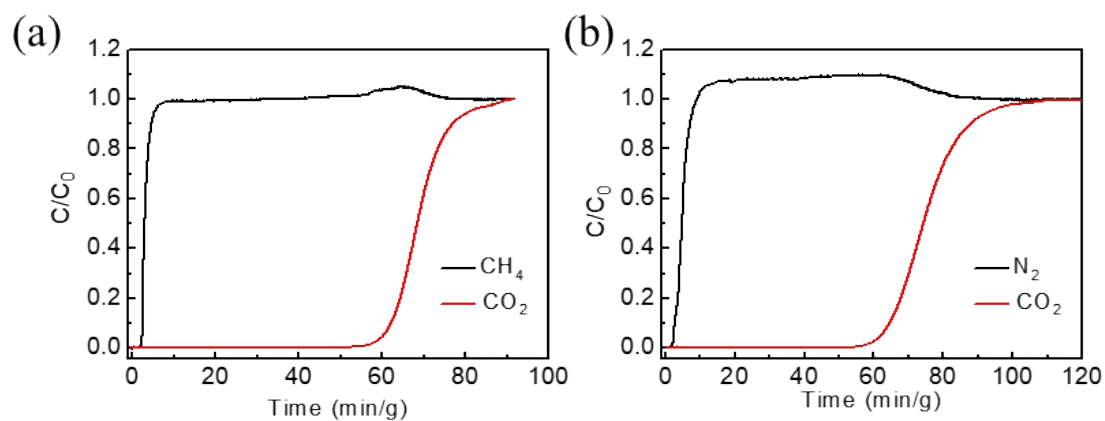

**Fig. S11.** Breakthrough experiments using Y-bptc for wet  $\text{CO}_2/\text{CH}_4$  (1/1) and  $\text{CO}_2/\text{N}_2$  (1/4) mixtures at 298 K.



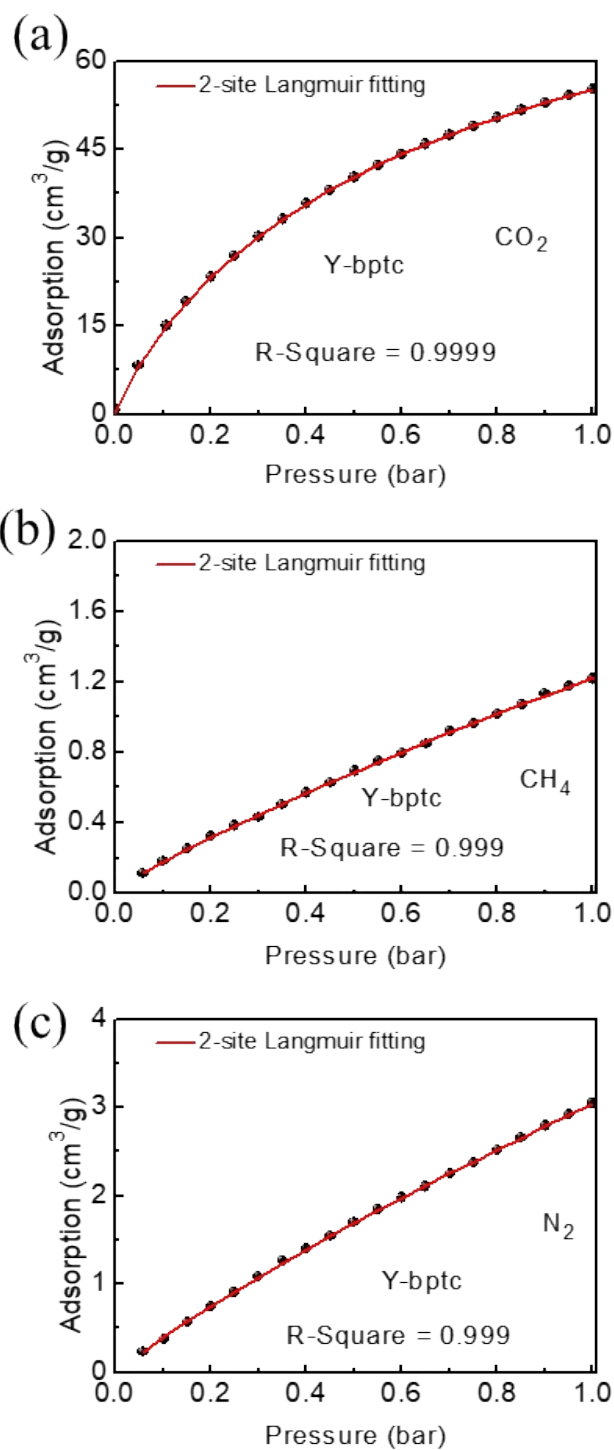

**Fig. S12.** CO<sub>2</sub>, CH<sub>4</sub> and N<sub>2</sub> adsorption isotherms at 298 K in Y-bptc with dual-site Langmuir model fits.

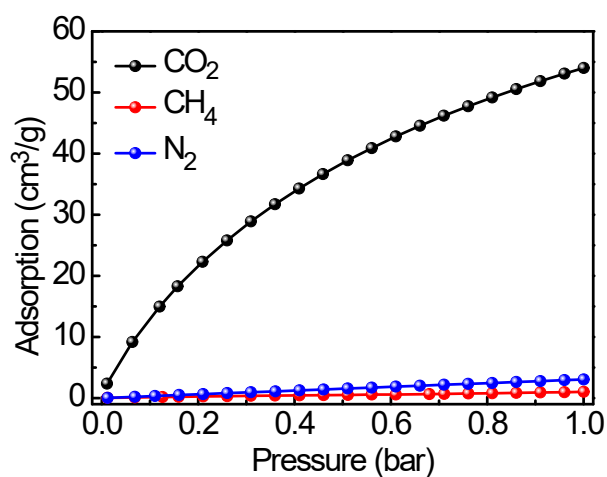

**Fig. S13.** The equilibrium adsorption isotherms of Y-bptc (~250 mg) for CO<sub>2</sub>, CH<sub>4</sub>, and N<sub>2</sub> at 298 K.

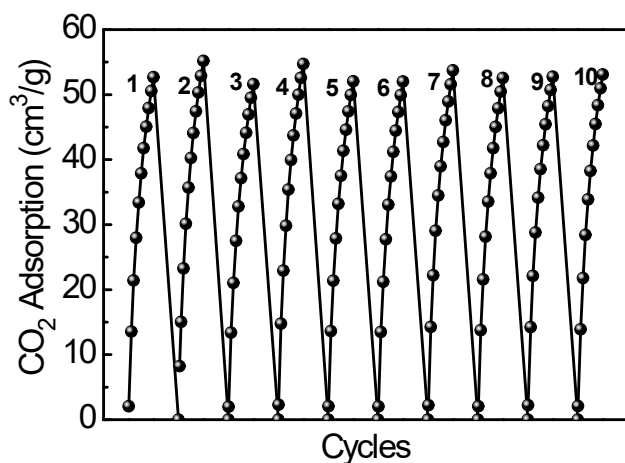

**Fig. S14.** Adsorption-desorption cycles for CO<sub>2</sub> in Y-bptc at 1 bar and 298 K.

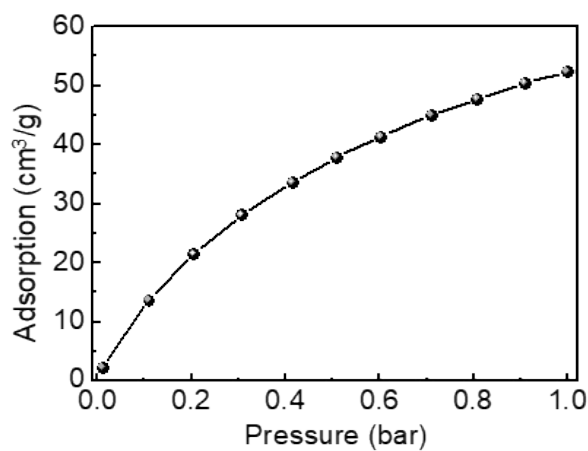

**Fig. S15.** The equilibrium adsorption isotherms of Y-bptc for CO<sub>2</sub> after activation at 573 K for 12 h.

**Table S1** Physicochemical properties of CO<sub>2</sub>, CH<sub>4</sub> and N<sub>2</sub>

| Structure                                                                                         | Molecular size (Å <sup>3</sup> ) | Kinetic diameter (Å) | Boiling point (K) | Polarizability (×10 <sup>-25</sup> /cm <sup>3</sup> ) | Quadrupole moment (×10 <sup>26</sup> /esu cm <sup>2</sup> ) |
|---------------------------------------------------------------------------------------------------|----------------------------------|----------------------|-------------------|-------------------------------------------------------|-------------------------------------------------------------|
| CO <sub>2</sub>  | 3.18 × 3.33 × 5.36               | 3.3                  | 194.7             | 29.11                                                 | -4.30                                                       |
| CH <sub>4</sub>  | 3.7 × 3.7 × 3.7                  | 3.758                | 111.66            | 25.93                                                 | 0                                                           |
| N <sub>2</sub>   | 3.6 × 3.6 × 3.6                  | 3.64                 | 77.35             | 17.403                                                | 1.52                                                        |

**Table S2** Summary of the equilibrium uptakes, CO<sub>2</sub>/CH<sub>4</sub> and CO<sub>2</sub>/N<sub>2</sub> uptake ratio in some reported MOFs.

| Adsorbents           | CO <sub>2</sub> uptake (cm <sup>3</sup> /g) | CH <sub>4</sub> uptake (cm <sup>3</sup> /g) | N <sub>2</sub> uptake (cm <sup>3</sup> /g) | CO <sub>2</sub> /CH <sub>4</sub> uptake ratio | CO <sub>2</sub> /N <sub>2</sub> uptake ratio | Reference |
|----------------------|---------------------------------------------|---------------------------------------------|--------------------------------------------|-----------------------------------------------|----------------------------------------------|-----------|
| Y-bptc               | 55.1                                        | 1.21                                        | 3.04                                       | 45.5                                          | 18.1                                         | This work |
| In(aip) <sub>2</sub> | 28.1                                        | 0.4                                         | 0.2                                        | 70.2                                          | 140.5                                        | [1]       |
| Qc-5-Cu-sql          | 48.4                                        | 1.3                                         | 0.3                                        | 37.2                                          | 161.3                                        | [2]       |
| SIFSIX-3-Zn          | 56.2                                        | 9                                           | 3.4                                        | 6.2                                           | 16.5                                         | [3]       |
| CALF-20              | 60.5                                        | -                                           | 5.2                                        | -                                             | 11.6                                         | [4]       |
| Mg-MOF-74            | 192.9                                       | 23.52                                       | -                                          | 8.2                                           | -                                            | [5]       |
| ZIF-8                | 18.1                                        | 6.3                                         | 2.2                                        | 2.87                                          | 8.22                                         | [6]       |
| UTSA-16              | 76.2                                        | 10.3                                        | 1.4                                        | 7.39                                          | 54.4                                         | [7]       |
| NJUBai35             | 72.8                                        | 20.2                                        | 4                                          | 3.6                                           | 18.2                                         | [8]       |
| FJU-44a              | 53.2                                        | 11.3                                        | 2.7                                        | 4.7                                           | 19.7                                         | [9]       |
| Cu-Fpymo             | 39.2                                        | 0.89                                        | 0.33                                       | 44                                            | 118                                          | [10]      |
| UTSA-280             | 67.3                                        | 4                                           | 6                                          | 16.8                                          | 11.2                                         | [11]      |
| SIFSIX-14-Cu-i       | 106                                         | 0.92                                        | -                                          | 115.2                                         | -                                            | [12]      |

|          |       |       |   |     |   |      |
|----------|-------|-------|---|-----|---|------|
| NOTT-400 | 109.7 | 17.92 | - | 6.1 | - | [13] |
| NOTT-401 | 64.9  | 20.1  | - | 3.2 | - | [13] |

**Table S3** Dual-Langmuir fitting parameters for CO<sub>2</sub>, CH<sub>4</sub> and N<sub>2</sub> in Y-bptc at 298 K.

|                 | Site A                                         |                            | Site B                                         |                            |
|-----------------|------------------------------------------------|----------------------------|------------------------------------------------|----------------------------|
|                 | $q_{A,sat}$<br>cm <sup>3</sup> g <sup>-1</sup> | $b_A$<br>bar <sup>-1</sup> | $q_{B,sat}$<br>cm <sup>3</sup> g <sup>-1</sup> | $b_B$<br>bar <sup>-1</sup> |
| CO <sub>2</sub> | 7.39                                           | 0.06                       | 84.56                                          | 0.75                       |
| CH <sub>4</sub> | 0.06                                           | 0.04                       | 8.29                                           | 6.14                       |
| N <sub>2</sub>  | 4.40                                           | 2.20                       | 2.11                                           | 1.04                       |

**Table S4** The element analysis of Y-bptc after activation at different temperatures.

|                  | “N”content (%) | [H <sub>2</sub> N(CH <sub>3</sub> ) <sub>2</sub> ] <sup>+</sup> (%) |
|------------------|----------------|---------------------------------------------------------------------|
| 473 K activation | 3.42           | 11.23                                                               |
| 573 K activation | 1.79           | 5.88                                                                |

The quantity of ammonium ions was calculated by measuring the “N” content through Element Analysis.

## References

1. Y.-M. Gu, H.-F. Qi, S. Qadir, T.-J. Sun, R. Wei, S.-S. Zhao, X.-W. Liu, Z. Lai and S.-D. Wang, *Chem. Eng. J.*, 2022, **449**, 137768.
2. K.-J. Chen, D. G. Madden, T. Pham, K. A. Forrest, A. Kumar, Q.-Y. Yang, W. Xue, B. Space, J. J. Perry IV, J.-P. Zhang, X.-M. Chen and M. J. Zaworotko, *Angew. Chem. Int. Ed.*, 2016, **55**, 10268-10272.
3. P. Nugent, Y. Belmabkhout, S. D. Burd, A. J. Cairns, R. Luebke, K. Forrest, T. Pham, S. Ma, B. Space, L. Wojtas, M. Eddaoudi and M. J. Zaworotko, *Nature*, 2013, **495**, 80-84.
4. J.-B. Lin, T. T. T. Nguyen, R. Vaidhyanathan, J. Burner, J. M. Taylor, H. Durekova, F. Akhtar, R. K. Mah, O. Ghaffari-Nik, S. Marx, N. Fylstra, S. S. Iremonger, K. W. Dawson, P. Sarkar, P. Hovington, A. Rajendran, T. K. Woo and G. K. H. Shimizu, *Science*, 2021, **374**, 1464-1469.
5. Z. Bao, L. Yu, Q. Ren, X. Lu and S. Deng, *J. Colloid Interface Sci.*, 2011, **353**, 549-556.
6. J. McEwen, J.-D. Hayman and A. Ozgur Yazaydin, *Chem. Phys.*, 2013, **412**, 72-76.
7. S. Xiang, Y. He, Z. Zhang, H. Wu, W. Zhou, R. Krishna and B. Chen, *Nat. Commun.*, 2012, **3**, 954.
8. J. Jiang, Z. Lu, M. Zhang, J. Duan, W. Zhang, Y. Pan and J. Bai, *J. Am. Chem. Soc.*, 2018, **140**, 17825-17829.
9. Y. Ye, H. Zhang, L. Chen, S. Chen, Q. Lin, F. Wei, Z. Zhang and S. Xiang,

- Inorg. Chem.*, 2019, **58**, 7754-7759.
10. Y. Shi, Y. Xie, H. Cui, Z. A. Alothman, O. Alduhaish, R.-B. Lin and B. Chen, *Chem. Eng. J.*, 2022, **446**, 137101.
  11. R.-B. Lin, L. Li, A. Alsalme and B. Chen, *Small Structures*, 2020, **1**, 2000022.
  12. M. Jiang, B. Li, X. Cui, Q. Yang, Z. Bao, Y. Yang, H. Wu, W. Zhou, B. Chen and H. Xing, *ACS. Appl. Mater. Interfaces.*, 2018, **10**, 16628-16635.
  13. I. A. Ibarra, A. Mace, S. Yang, J. Sun, S. Lee, J.-S. Chang, A. Laaksonen, M. Schröder and X. Zou, *Inorg. Chem.*, 2016, **55**, 7219-7228.
